# Supplementary material for: Efficient atom and step economic (EASE) synthesis of the “smart drug” Modafinil
Source: Royal Society of Chemistry journal article supplement (doi:10.1039/c6gc02623k), 2016-11-30
Supplement: c6gc02623k1.pdf [file c6gc02623k1.pdf]

## SUPPORTING INFORMATION

### Efficient Atom and Step Economic (EASE) Synthesis of smart drug Modafinil

Shivam Maurya<sup>a,b</sup>, Dhiraj Yadav<sup>a</sup>, Kemant Pratap<sup>a,b</sup> and Atul Kumar<sup>\*a,b</sup>

*<sup>a</sup>Medicinal and Process Chemistry Division, CSIR-Central Drug Research Institute, 10/1,  
Sector 10, Jankipuram Extension, Lucknow-226031 India.*

*<sup>b</sup>Academy of Scientific & Innovative Research (AcSIR) New Delhi.*

*E-mail: dratulsax@gmail.com, atul\_kumar@cdri.res.in*

---

### Table of Contents

|    |                                           |       |
|----|-------------------------------------------|-------|
| 1. | General information & Background          | 2     |
| 2. | Green metrics calculations: Formulae used | 3     |
| 3. | Green metrics calculations                | 4-11  |
| 4. | Experimental procedure                    | 11-12 |
| 5. | Spectral charts                           | 13-16 |

## **1. General information**

All reagents and solvents were purchased from commercial sources and used as received. The progress of the reaction was monitored by analytical TLC on silica gel G/GF 254 plates. Reagent grade solvents were used for extraction and flash chromatography. The column chromatography was performed with silica gel 230-400 mesh. NMR ( $^1\text{H}$  and  $^{13}\text{C}$ ) spectra were recorded on a 300 & 400 MHz using TMS as an internal standard and chemical shifts ( $\delta$  ppm) (multiplicity, coupling constant (Hz), integration). The abbreviations for multiplicity are as follows: s = singlet, d = doublet, t = triplet, q = quartet, m = multiplet, dd = doublet of doublets. Melting points are uncorrected were determined in capillary tubes on a hot stage melting point apparatus containing silicon oil. High-resolution mass spectra (ESI-HRMS) were recorded on Agilent 6520 ESI-QTOP mass spectrometer.. IR spectra were recorded using a FTIR spectrophotometer.

## **Background**

Smart drug<sup>1</sup> Modafinil (2-(diphenylmethylsulfinyl)acetamide) is a wakefulness promoting agent approved by the Food and Drug Administration in the United States<sup>2</sup>, used for treatment of disorders such as shift work sleep disorder, and excessive daytime sleepiness associated with obstructive sleep apnea<sup>3</sup>. It is a central nervous system stimulant reported to have little abuse potential. At pharmacologically relevant concentrations, modafinil does not bind to most potentially relevant receptors for sleep/wake regulation, including those for norepinephrine, serotonin, dopamine, adenosine, histamine-3, melatonin, or benzodiazepines. Modafinil is under investigation as a possible method to treat cocaine dependence<sup>4</sup>. It is also used in militaries where soldiers face sleep deprivation as an alternative to amphetamine<sup>5</sup> as well as by astronauts on long-term missions aboard the International Space Station<sup>6</sup>. We report an efficient atom and step economic (EASE) synthesis for Modafinil, a key

psychostimulant drug, utilised for treatment of narcolepsy<sup>7,8</sup>. The developed post-sulfoxidation protocol for the synthesis of Modafinil, exhibits improved green chemistry matrix, utilizing recyclable heterogeneous catalyst Nafion-H. Additionally a superior pre-sulfoxidation approach for Modafinil has been developed.

### **3. Green metrics calculations: Formulae used**

For a **linear synthetic process**<sup>9,10</sup>:

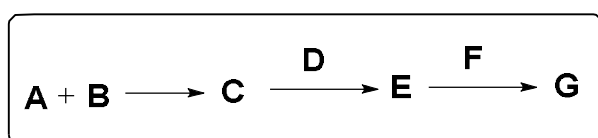

Steps involved in this process are:

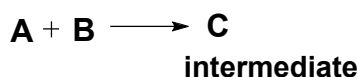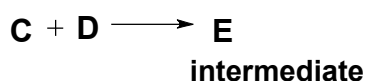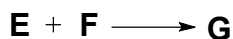

The reactants and reagents efficiently participate in product formation excluding intermediates are:

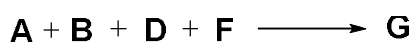

1. No. of steps = No. of steps involved in the process

2. Atom economy =

$$[(\text{M.W. of product G})/(\text{M.W. of A} + \text{M.W. of B} + \text{M.W. of D} + \text{M.W. of F})] \times 100$$

3. % yield = (Observed yield/ Calculated yield) x100

4. Atom efficiency = % yield x Atom economy

5. Carbon efficiency =

$$[(\text{no. of moles of product G} \times \text{no. of carbons in product G})/ \{(\text{no. of moles of A} \times \text{no. of carbons in A}) + (\text{no. of moles of B} \times \text{no. of carbons in B}) + (\text{no. of moles of D} \times \text{no. of carbons in D}) + (\text{no. of moles of F} \times \text{no. of carbons in F})\}] \times 100$$

6. Mass intensity = (Total mass used in the process / Mass of the product)

7. Mass productivity = (1/ Mass intensity) x100

8. E- factor = (Mass intensity – 1)

9. Effective Mass Yield = (1/ E- factor) x100

10. Reaction Mass Efficiency =

$$[(\text{Mass of product G}) / (\text{Mass of A} + \text{Mass of B} + \text{Mass of D} + \text{Mass of F})] \times 100$$

### **3. Green metrics calculations:**

#### **Post-Sulfoxidation approach:**

##### **US4177290**

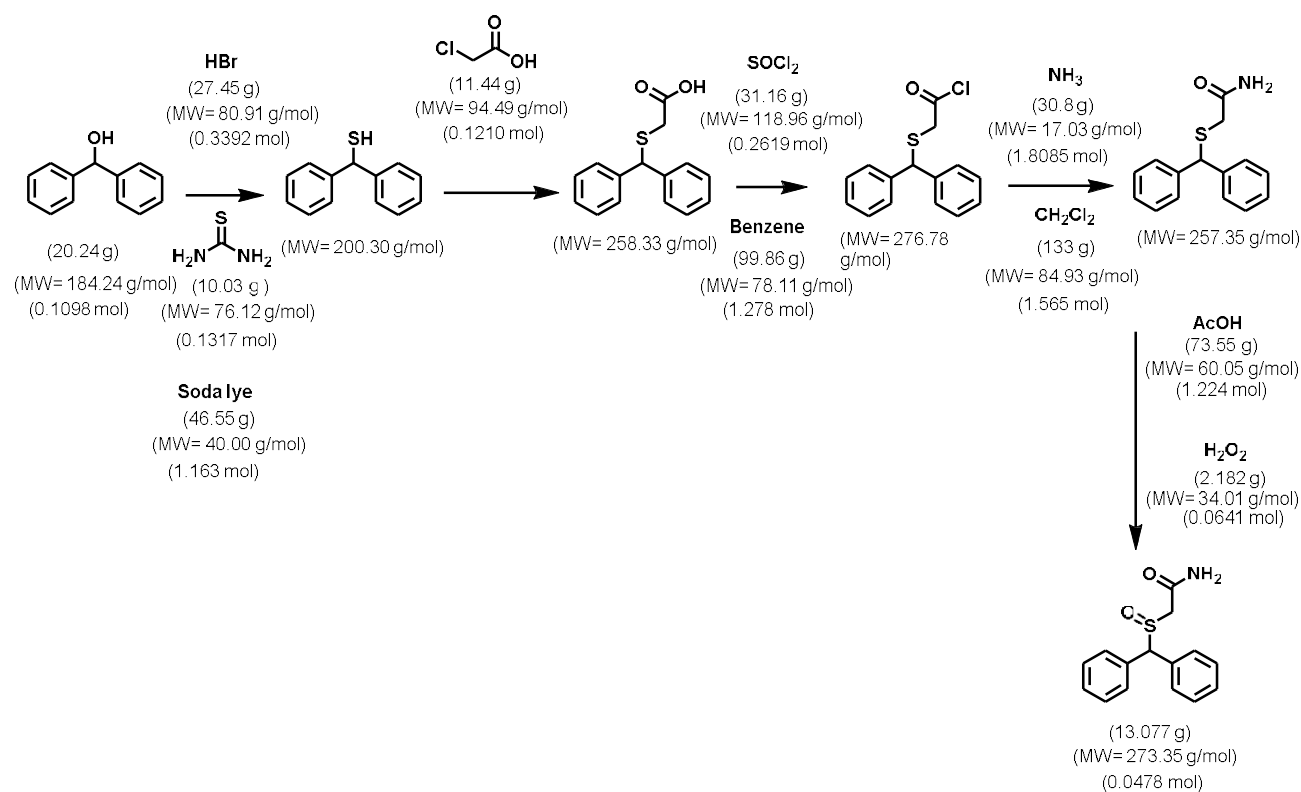

**Scheme 1.1**

These individual steps are involved in the reaction:

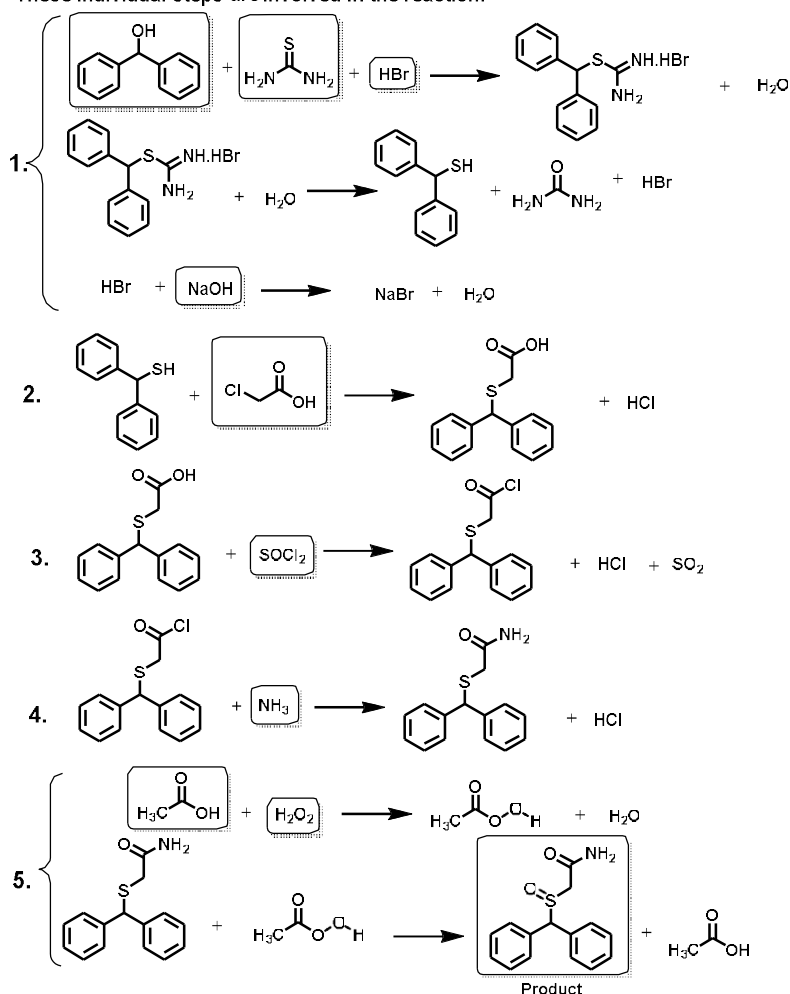

Note: Reactants and reagents present in circle efficiently participate in product formation excluding intermediates. Each step should be a balanced step for calculation purpose.

## Scheme 1.2

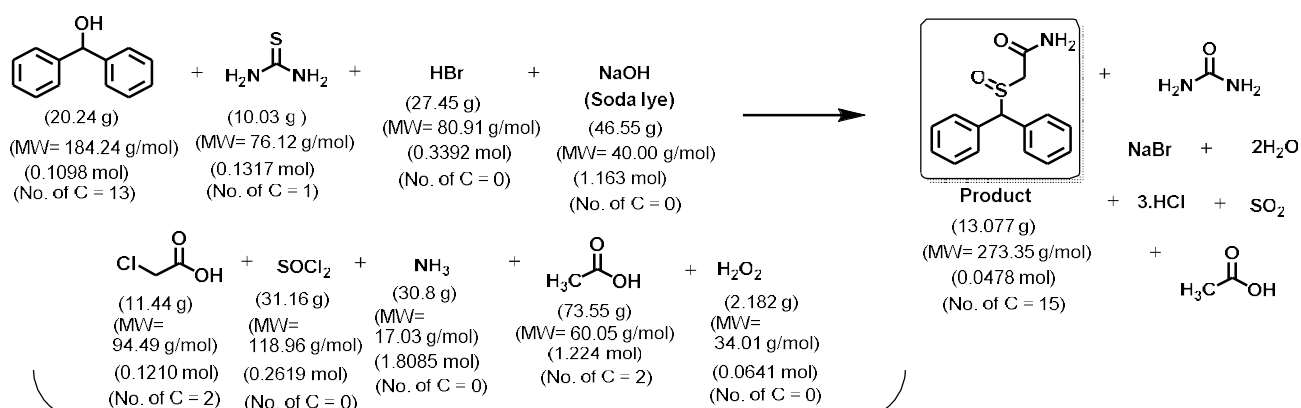

Note: These reactants and reagents efficiently participate in the product formation excluding intermediates. Reaction stoichiometry should be balanced for calculation.

## Scheme 1.3

1. No of steps = 5
2. Atom economy =  

$$\{(273.35)/(184.24+76.12+80.91+40.00+94.49+118.96+17.03+60.05+34.01)\} \times 100 = 38.72\%$$
3. % yield =  $(13.077/30.029) \times 100 = 43.54\%$
4. Atom efficiency =  $(43.54/100) \times 38.72 = 16.85$
5. Carbon efficiency =  

$$[(0.0478 \times 15) / \{(0.1098 \times 13) + (0.1317 \times 1) + (0.3392 \times 0) + (1.163 \times 0) + (0.1210 \times 2) + (0.2619 \times 0) + (1.8085 \times 0) + (1.224 \times 2) + (0.0641 \times 0)\}] \times 100$$

$$= 16.87\%$$
6. Mass intensity =  

$$(20.24+10.03+27.45+46.55+11.44+31.16+99.86+30.8+133+73.55+2.182)/(13.077) = 37.184 \text{ kg/kg}$$
7. Mass productivity =  $(1 / 37.184) \times 100 = 2.689 \%$
8. E-factor =  $(37.184 - 1) = 36.184 \text{ kg/kg}$
9. Effective Mass Yield =  $(1/36.184) \times 100 = 2.763\%$
10. Reaction Mass Efficiency =  

$$[(13.077)/(20.24+10.03+27.45+46.55+11.44+31.16+30.8+73.55+2.182)] \times 100 = 5.16\%$$

### US2004/0106829 A1

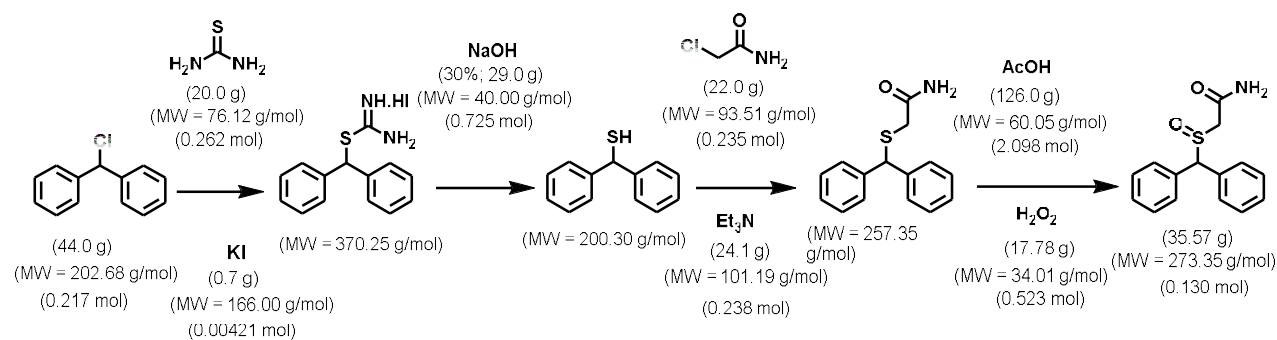

**Scheme 2.1**

These individual steps are involved in the reaction:

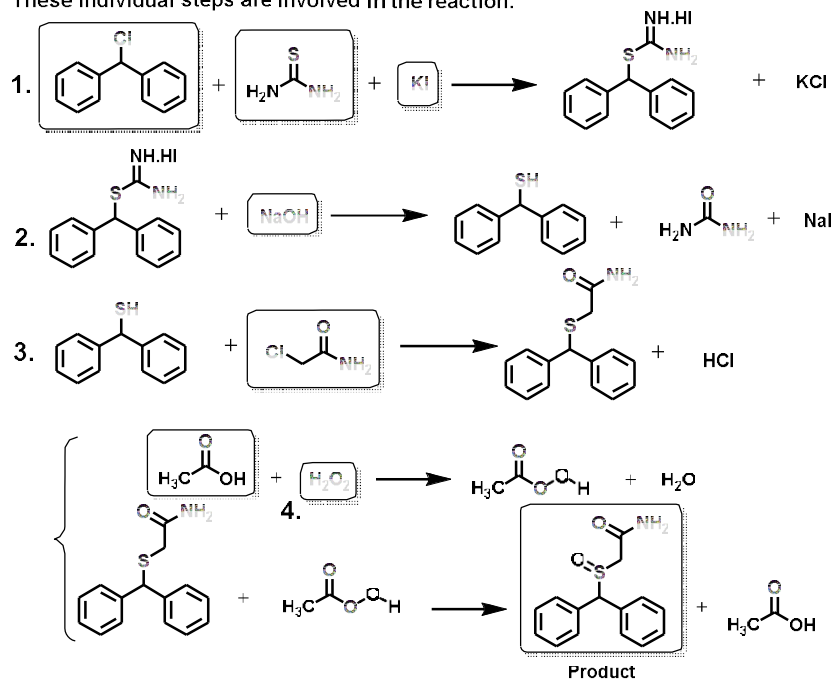

Note: Reactants and reagents present in circle efficiently participate in product formation excluding intermediates. Each step should be a balanced step for calculation purpose.

## Scheme 2.2

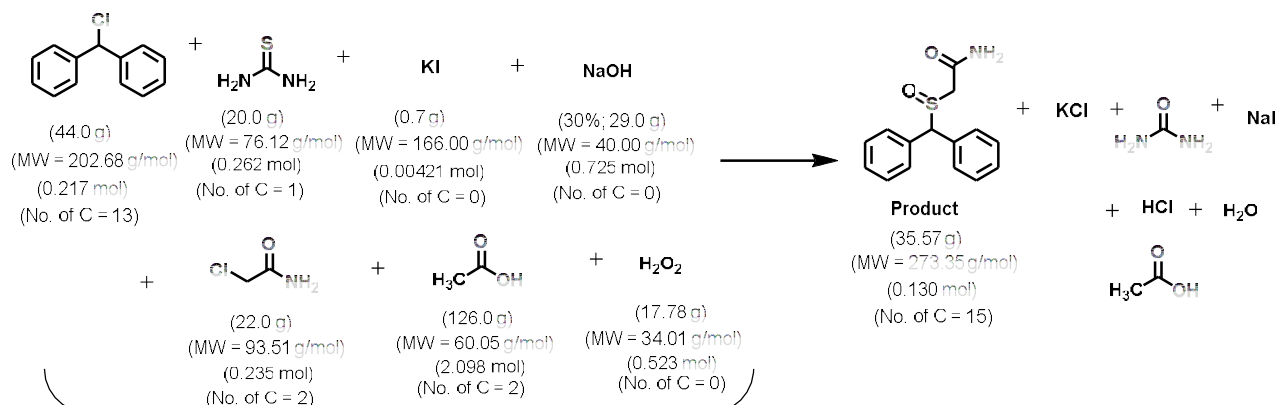

Note: These reactants and reagents efficiently participate in product formation excluding intermediates. Reaction stoichiometry should be balanced for calculation.

## Scheme 2.3

1. No of steps = 4
2. Atom economy =  $\{(273.35)/(202.68+76.12+166.00+40.00+93.51+60.05+34.01)\} \times 100 = 40.65\%$
3. % yield =  $(35.57/59.34) \times 100 = 60\%$
4. Atom efficiency =  $(60/100) \times 40.65\% = 24.39$
5. Carbon efficiency =

$$\frac{[(0.130 \times 15)]}{\{(0.217 \times 13) + (0.262 \times 1) + (0.00421 \times 0) + (0.725 \times 0) + (0.235 \times 2) + (2.098 \times 2) + (0.523 \times 0)\}} \times 100 = 25.164\%$$

6. Mass intensity =  $(44.0 + 20.0 + 0.7 + 29.0 + 22.0 + 24.1 + 17.78 + 126.0) / (35.57) = 7.972 \text{ kg/kg} \approx 8 \text{ kg/kg}$

7. Mass productivity =  $(1 / 7.972) \times 100 = 12.54 \%$

8. E-factor =  $(7.972 - 1) = 6.972 \text{ kg/kg} \approx 7 \text{ kg/kg}$

9. Effective Mass Yield =  $(1 / 6.972) \times 100 = 14.343\%$

10. Reaction Mass Efficiency =  $[(35.57) / (44.0 + 20.0 + 0.7 + 29.0 + 22.0 + 126.0 + 17.78)] \times 100 = 13.708\%$

### Our work

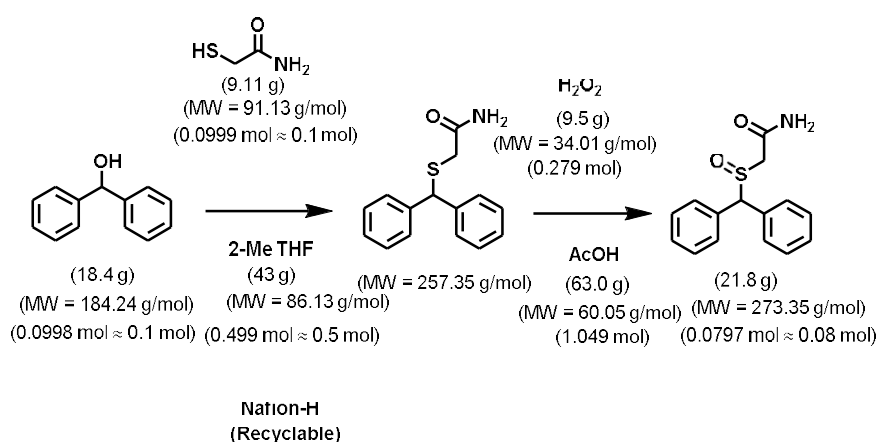

### Scheme 3.

1. No of steps = 2

2. Atom economy =  $\{(273.35) / (184.24 + 91.13 + 34.01)\} \times 100 = 88.35\%$

3. % yield =  $(21.8 / 27.29) \times 100 = 80\%$

4. Atom efficiency =  $(80 / 100) \times 88.35 = 70.68$

5. Carbon efficiency =  $[(0.08 \times 15)] / \{(0.1 \times 13) + (0.1 \times 2) + (0.279 \times 0)\} \times 100 = 80.0\%$

6. Mass intensity =  $(18.4 + 9.11 + 43.0 + 63.0 + 9.5) / (21.8) = 6.56 \text{ kg/kg}$

7. Mass productivity =  $(1 / 6.56) \times 100 = 15.24 \%$

8. E-factor =  $(6.56 - 1) = 5.56 \text{ kg/kg}$

9. Effective Mass Yield =  $(1 / 5.56) \times 100 = 17.98\% \approx 18 \%$

10. Reaction Mass Efficiency =  $[(21.8) / (18.4 + 9.11 + 9.5)] \times 100 = 59.0\%$



## Pre-Sulfoxidation approach:

US2007/0015836

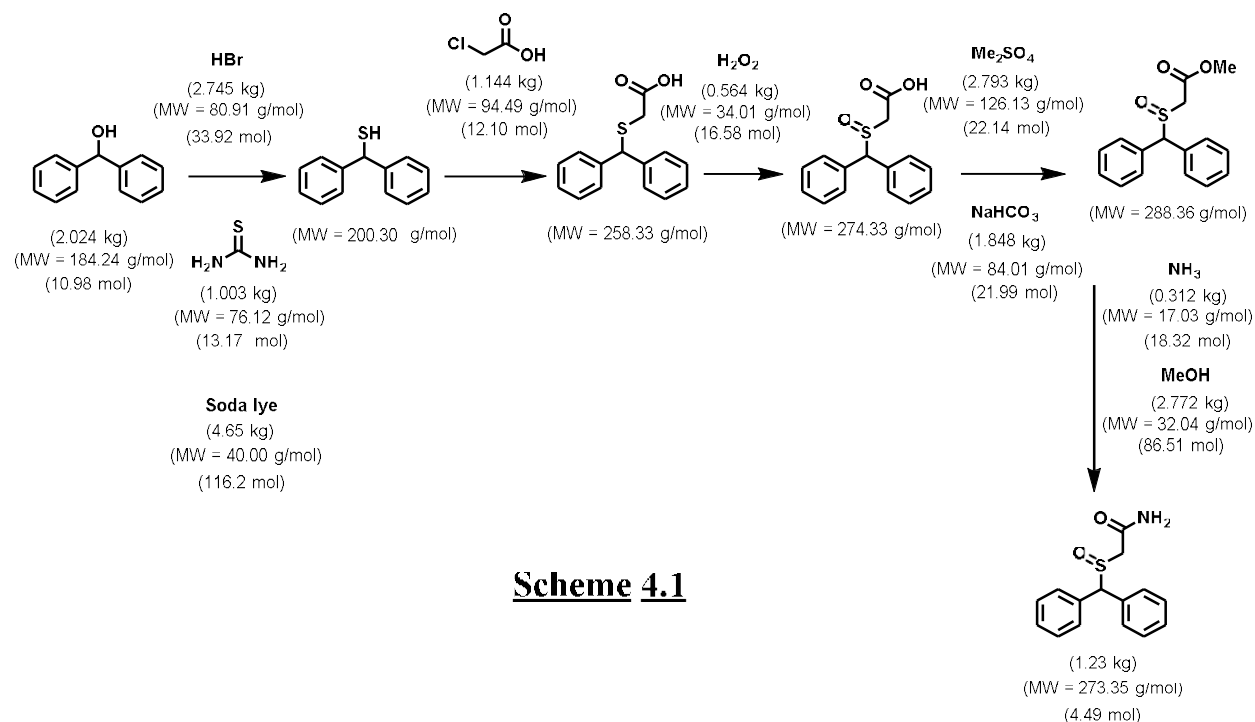

**Scheme 4.1**

These individual steps are involved in the reaction:

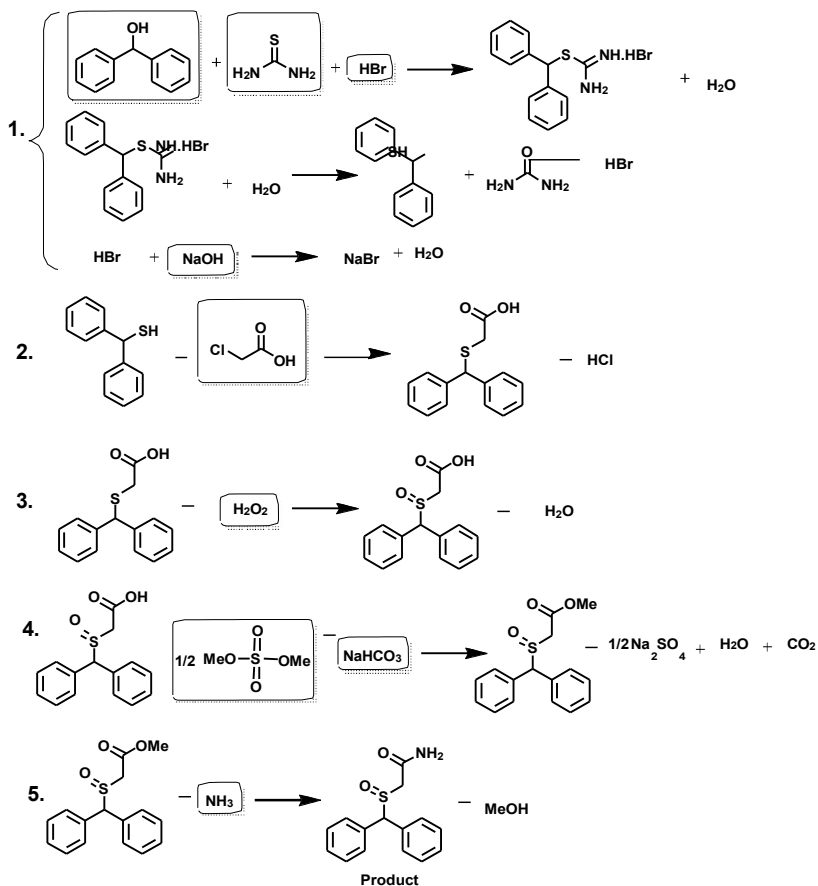

Note: Reactants and reagents present in circle efficiently participate in product formation excluding intermediates. Each step should be a balanced step for calculation purpose.

**Scheme 4.2**

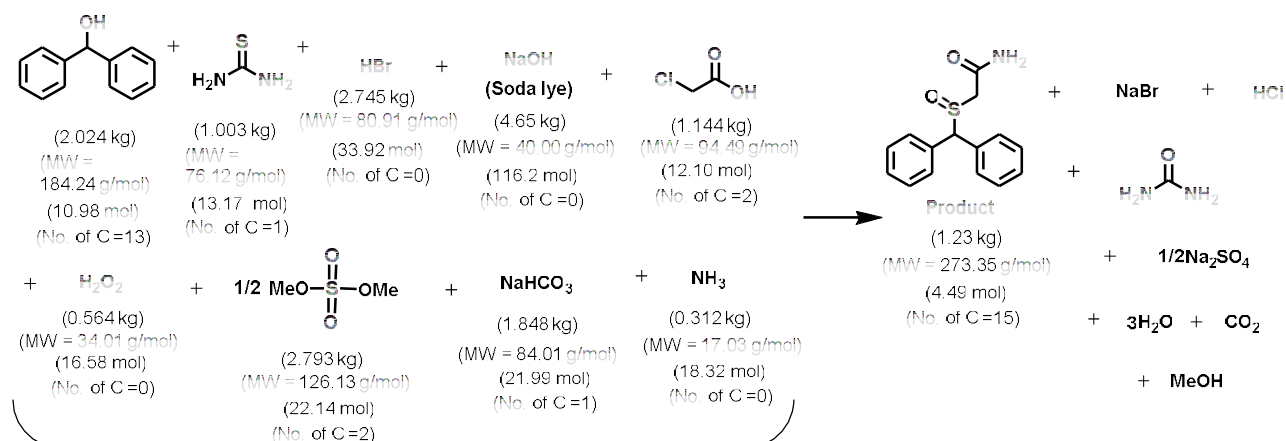

**Note:**

These reactants and reagents efficiently participate in product formation excluding intermediates. Reaction stoichiometry should be balanced for calculation.

### Scheme 4.3

1. No of steps = 5

2. Atom economy =

$$\{(273.35)/(184.24+76.12+80.91+40.00+94.49+34.01+(0.5 \times 126.13)+84.01+17.03)\} \times 100 = 40.563\%$$

3. % yield =  $(1.23/3.00) \times 100 = 41\%$

4. Atom efficiency =  $(41/100) \times 40.563 = 16.63$

5. Carbon efficiency =

$$\begin{aligned} & [(4.49 \times 15) / \{(10.98 \times 13) + (13.17 \times 1) + (33.92 \times 0) + (116.2 \times 0) + (12.10 \times 2) + (16.58 \times 0) + (22.14 \times 2) + (21.99 \times 1) \\ & + (18.32 \times 0)\}] \times 100 \\ & = 27.335\% \end{aligned}$$

6. Mass intensity =

$$(2.024+1.003+2.745+4.655+1.144+0.564+2.793+1.848+1.463+0.312+2.772)/(1.23) = 17.335 \text{ kg/kg}$$

7. Mass productivity =  $(1 / 17.335) \times 100 = 5.768 \%$

8. E-factor =  $(17.335 - 1) = 16.335 \text{ kg/kg}$

9. Effective Mass Yield =  $(1/16.335) \times 100 = 6.121 \%$

10. Reaction Mass Efficiency =

$$[(1.23)/(2.024+1.003+2.745+4.65+1.144+0.564+2.793+1.848+0.312)] \times 100 = 7.20 \%$$

## Our work

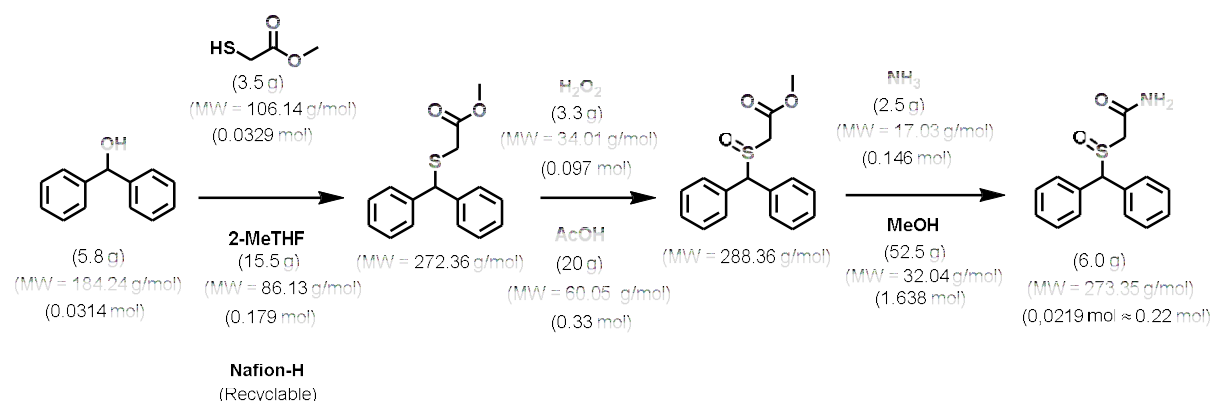

### Scheme 5.

1. No of steps = 3
2. Atom economy =  $\{(273.35)/(184.24+106.14+34.01+17.03)\} \times 100 = 80.0\%$
3. % yield =  $(6.0/8.6) \times 100 = 70\%$
4. Atom efficiency =  $(70/100) \times 80.0 = 56$
5. Carbon efficiency =  $[(0.0219 \times 15)/\{(0.0314 \times 13) + (0.0329 \times 3)\}] \times 100 = 65.1\%$
6. Mass intensity =  $(5.8+3.5+15.5+20.0+3.3+2.5+52.5)/(6.0) = 17.183 \text{ kg/kg}$
7. Mass productivity =  $(1 / 17.183) \times 100 = 5.819 \%$
8. E-factor =  $(17.183 - 1) = 16.183 \text{ kg/kg}$
9. Effective Mass Yield =  $(1/ 16.183) \times 100 = 6.17 \%$
10. Reaction Mass Efficiency =  $[(6.0)/(5.8+3.5+3.3+2.5)] \times 100 = 39.73\%$

## 4. Experimental procedure : Post-Sulfoxidation approach:

**Synthesis of 2-(benzhydrylthio)acetamide:** Mixture of 2-mercaptoacetamide (0.1 mol), diphenylmethanol (0.1 mol) and Nafion-H (0.02 gm) in 2-Me THF (50 ml) was stirred at r.t. overnight. The solvent was removed, the mixture was diluted with H<sub>2</sub>O (20 mL), extracted and dried with Na<sub>2</sub>SO<sub>4</sub>. The solvent was removed and obtained white pure product (Yield 88%).

**Synthesis of 2-(benzhydrylsulfinyl)acetamide (Modafinil):** H<sub>2</sub>O<sub>2</sub> (35% w/w aqueous solution; 0.28 mol) was slowly added in 2-(benzhydrylthio)acetamide (0.087 mol) in AcOH (60 ml; d = 1.05 g/cm<sup>3</sup>). The reaction was stirred and heated in water bath at 50°C for 2 hrs and reaction progress was monitored by TLC. The mixture was cooled by adding ice

followed by vacuum filtration to obtain the crude solid which upon recrystallization in aqueous methanol yield white solid (Yield 91%).

### **Pre-Sulfoxidation approach:**

**Synthesis of Methyl 2-(benzhydrylthio)acetate:** A mixture of Diphenylmethanol (0.034 mol) and methylthioglycolate (0.033 mol) and Nafion-H (0.05 mol) in 2-MeTHF (18 mL; d=0.86 g/ml ) was stirred at r.t. overnight. The solvent was removed, the mixture was diluted with H<sub>2</sub>O (20 mL), extracted and dried with Na<sub>2</sub>SO<sub>4</sub>. The solvent was removed and obtained light red (oily) pure product (Yield 92%).

**Synthesis of Methyl 2-(benzhydrylsulfinyl)acetate :** H<sub>2</sub>O<sub>2</sub> (35% w/w aqueous solution; 0.097 mol) was slowly added in Methyl 2-(benzhydrylthio)acetate (0.029 mol) in AcOH (19 ml; d=1.05 g/cm<sup>3</sup>). The reaction was stirred and heated in water bath at 50°C for 2 hrs and reaction progress was monitored by TLC. The mixture was cooled by adding ice followed by vacuum filtration to obtain pale yellow gummy liquid (Yield 96%).

**Synthesis of 2-(benzhydrylsulfinyl)acetamide (Modafinil):** A mixture of Methyl 2-(benzhydrylsulfinyl)acetate (0.0277 mol), NH<sub>3</sub> (2.5 g) solution in MeOH (50 ml) ( ie. 50 ml, methanolic ammonia 3M) was stirred at 50 °C for 4-5 hr. Reaction mixture was filtered, filtrate was collected and dried to get white solid pure product (Yield 79%).

**Regeneration of catalyst:** The catalyst was washed with acetone and deionized water then dried overnight at 100°C to reuse.

Table. Recyclability studies of Nafion-H in the synthesis of 2-(benzhydrylthio)acetamide (2)

| Run   | 1 <sup>st</sup> | 2 <sup>nd</sup> | 3 <sup>rd</sup> | 4 <sup>th</sup> | 5 <sup>th</sup> |
|-------|-----------------|-----------------|-----------------|-----------------|-----------------|
| Yield | 88              | 88              | 87              | 85              | 84              |

## **5. Spectral charts**

**Modafinil** Physical State – White solid; M.p. 158-159°C, IR (KBr): 3383, 3314, 3256, 1690, 1616, 1494, 1376, 1027, 702 cm<sup>-1</sup>; <sup>1</sup>H NMR (CDCl<sub>3</sub>) δ(ppm): 3.14(d, J=14.3 Hz, 1H); 3.48(d, J=14.3 Hz, 1H); 5.24(s, 1H); 5.88(br s, 1H); 7.09(br s, 1H); 7.29-7.43(m, 7H); 7.43-7.51(m, 3H); <sup>13</sup>C NMR (CDCl<sub>3</sub>) δ(ppm): 52.00, 71.61, 128.80, 128.98, 129.10, 129.58, 129.62, 134.30, 134.74, 166.46; Molecular formula C<sub>15</sub>H<sub>15</sub>NO<sub>2</sub>S; ESI-MS (m/z): 274.1 (M+H) .

**2-(Benzhydrylthio)acetamide** Physical State – White solid; M.p. 108-110°C, IR (KBr): 3383, 3026, 1643, 1490, 1449, 1409, 696cm<sup>-1</sup>; <sup>1</sup>H NMR (CDCl<sub>3</sub>) δ(ppm): 3.12(s, 2H); 5.20(s, 1H), 5.55(br s, 1H); 6.54(br s, 1H); 7.26-7.30(m, 2H); 7.30-7.37(m, 4H); 7.37-7.45(m, 4H). <sup>13</sup>C NMR (CDCl<sub>3</sub>) δ(ppm): 35.60, 54.75, 127.65, 128.29, 128.78, 140.24, 171.48. Molecular formula C<sub>15</sub>H<sub>15</sub>NOS; ESI-MS (m/z): 258.3 (M+H) .

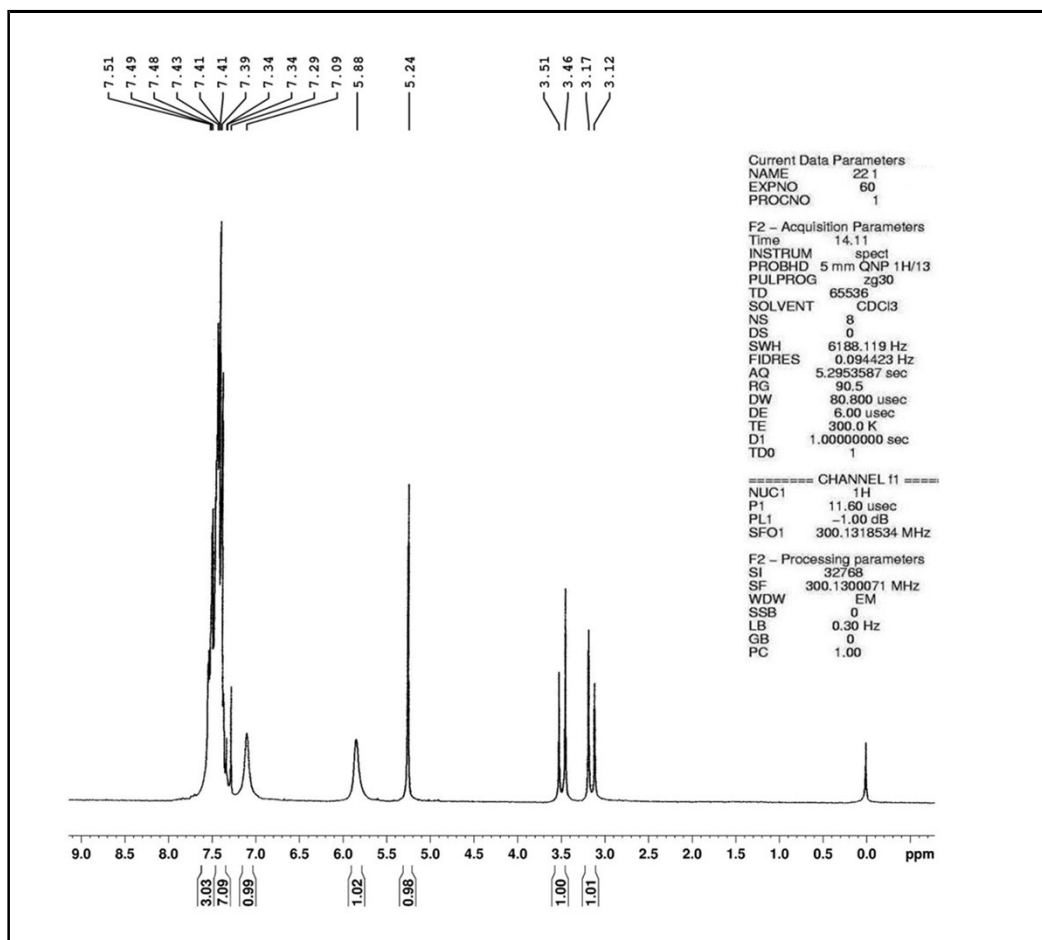

$^1\text{H}$  Spectra of Modafinil

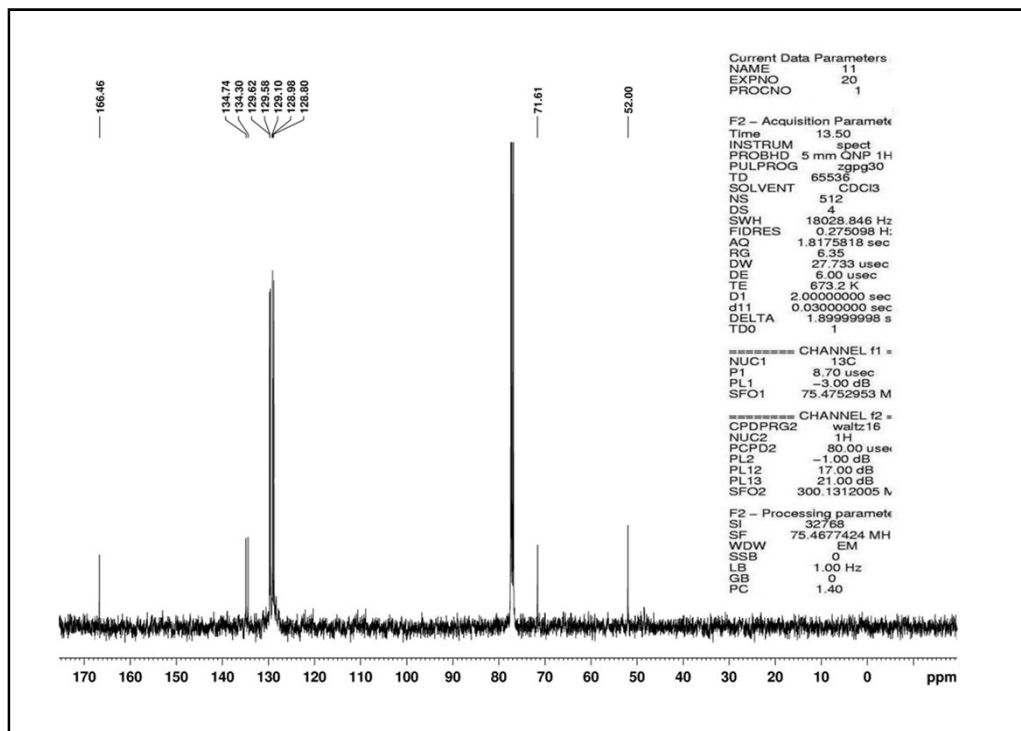

$^{13}\text{C}$  Spectra of Modafinil

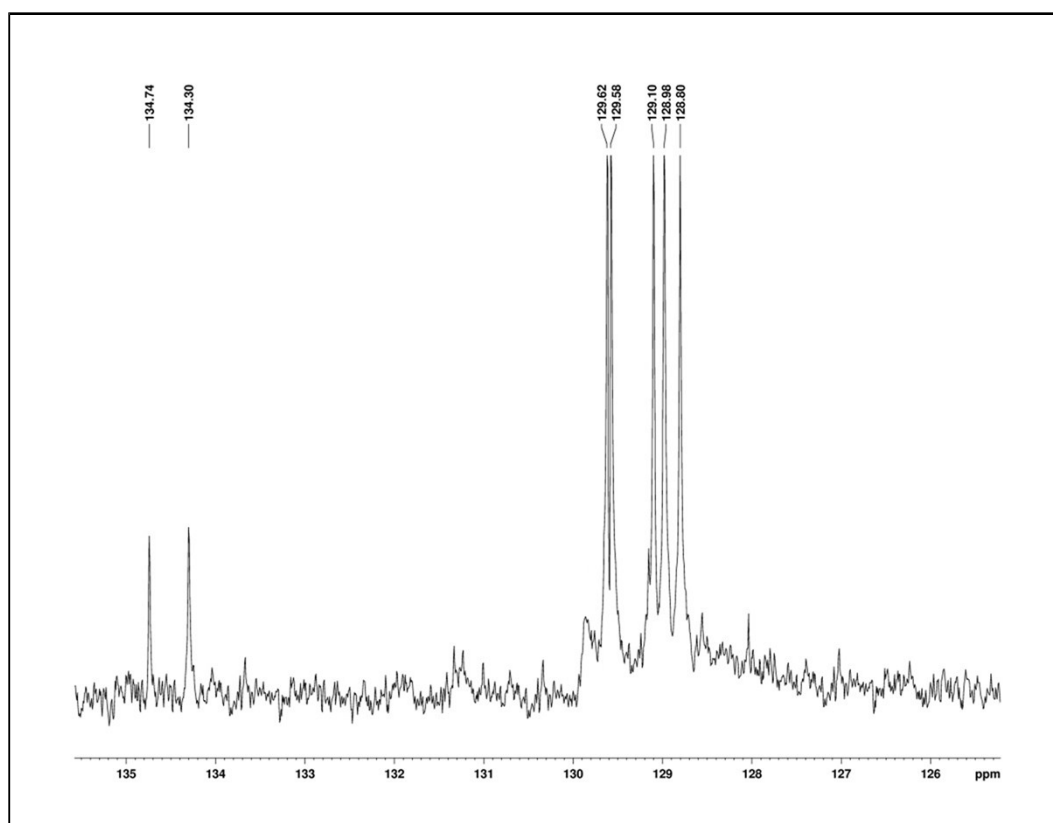

$^{13}\text{C}$  NMR spectrum of modafinil expanded in the aromatic region

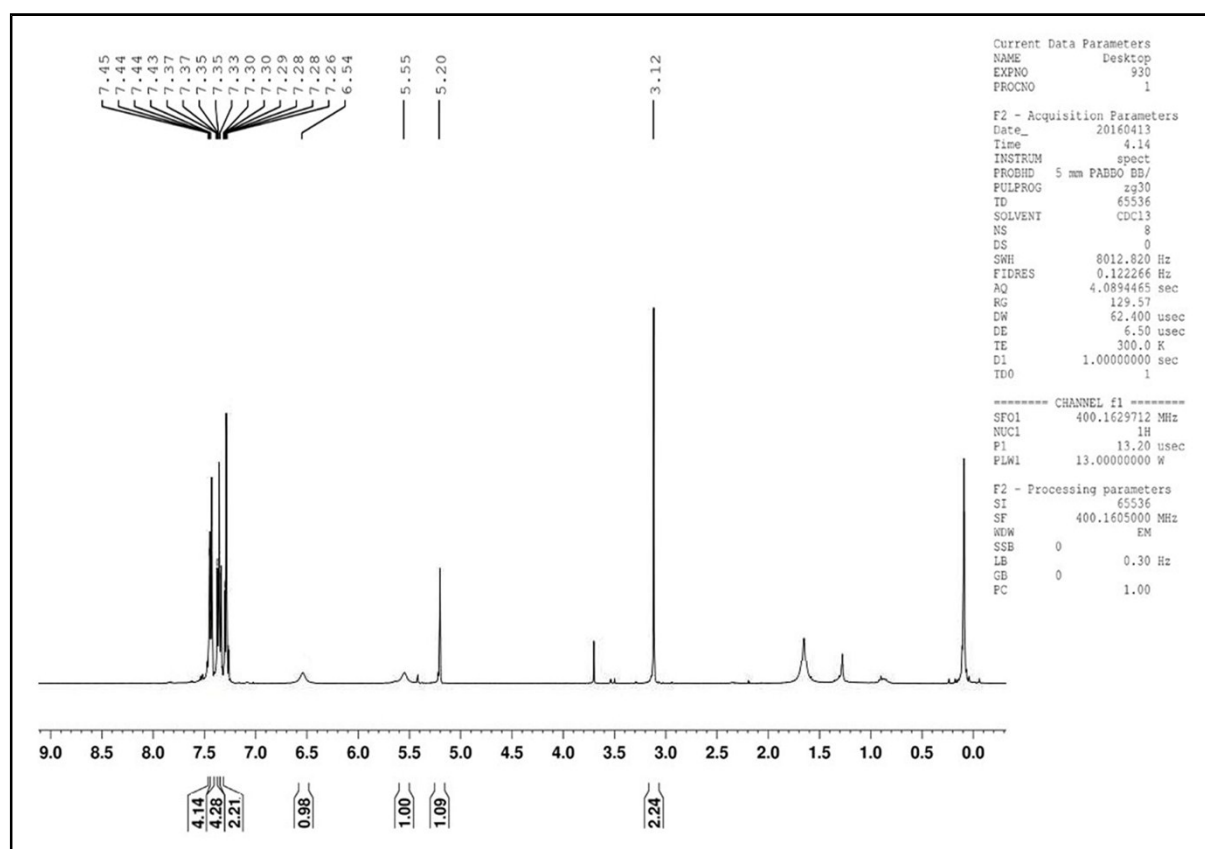

$^1\text{H}$  Spectra of 2-(Benzhydrylthio)acetamide

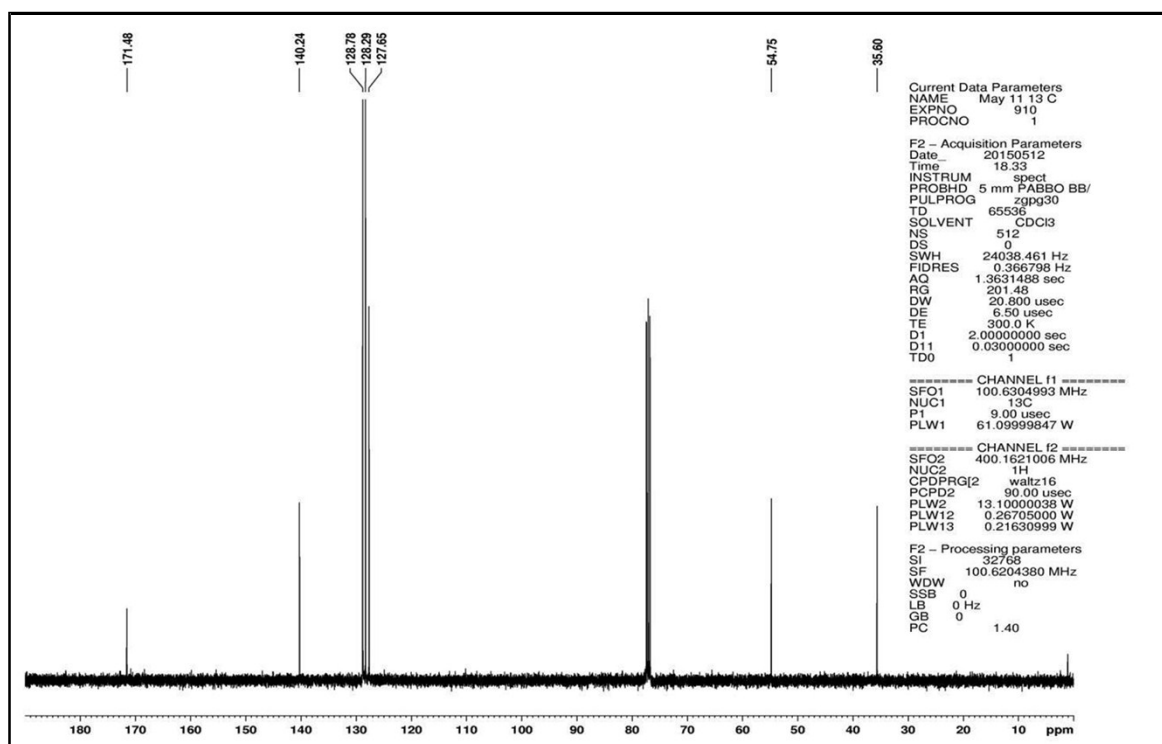

<sup>13</sup>C Spectra of 2-(Benzhydrylthio)acetamide

## References

1. Battleday, R.M.; Brem, A.-K. Modafinil for cognitive neuroenhancement in healthy non-sleep-deprived subjects: A systematic review. *Eur Neuropsychopharmacol.*; **25**(11), 1865-81 (2015).
2. Healy M (May 2, 2013). "Use of wakeup drug modafinil takes off, spurred by untested uses – Los Angeles Times". LA Times. Retrieved December 31, 2013.
3. Kesselheim AS, Myers JA, Solomon DH, Winkelmayer WC, Levin R, Avorn J (February 21, 2012). AlessiSeverini S, ed. "The prevalence and cost of unapproved uses of topselling orphan drugs". *PloS One*. 7 (2): e31894. doi:10.1371/journal.pone.0031894. PMC 3283698 . PMID 22363762.
4. Dackis CA, Kampman KM, Lynch KG, Pettinati HM, O'Brien CP (Jan 2005). "A doubleblind, placebocontrolled trial of modafinil for cocaine dependence". *Neuropsychopharmacology*. 30 (1): 205–11. doi:10.1038/sj.npp.1300600. PMID 15525998.

5. Taylor GP, Jr; Keys RE (December 1, 2003). "Modafinil and management of aircrew fatigue" (PDF). United States Department of the Air Force. Retrieved September 18, 2009.
6. Thirsk R, Kuipers A, Mukai C, Williams D (Jun 2009). "The spaceflight environment: the International Space Station and beyond". *Cmaj*. 180 (12): 1216–20. doi:10.1503/cmaj.081125. PMC 2691437 . PMID 19487390.
7. Minzenberg, M. J.; Carter, C. S. Modafinil: A review of neurochemical actions and effects on cognition. *Neuropsychopharmacology* **33**, 1477–1502 (2008).
8. Ferraro, L.; Antonelli, T.; Tanganelli, S.; O'Connor, W. T.; Perez de la Mora, M.; Mendez-Franco, J.; Rambert, F. A.; Fuxe, K. The vigilance promoting drug modafinil increases extracellular glutamate levels in the medial preoptic area and the posterior hypothalamus of the conscious rat: prevention by local GABAA receptor blockade. *Neuropsychopharmacology*. **20**, 346–356 (1999).
9. David J. C. Constable, Alan D. Curzons and Virginia L. Cunningham, *Green Chemistry*, 2002, **4**, 521–527.
10. Alan D. Curzons, David J. C. Constable, David N. Mortimer and Virginia L. Cunningham, *Green Chemistry*, 2001, **3**, 1–6.
